# Supplementary material for: Rare pathogenic structural variants show potential to enhance prostate cancer germline testing for African men
Source: Research Square preprint supplement (doi:10.21203/rs.3.rs-4531885/v1), 2024-06-13
Supplement: Supplementary file 1 [file 70bf91601295bf8e80658efa.xlsx]

## Sheet: TableSData1
Gene name	dbVar call ID	dbVar variant region ID	dbVar Location (GRCh38)	dbVar VAF (AC/AN)1	dbVar VAF of AFR (AC/AN)1	dbVar VAF of EUR (AC/AN)1	dbVar study	dbVar study ID
SLC3A1	nssv18789045	nsv7096642	chr2: 44,281,367 – 44,281,561	Not provided			ClinVar	nstd102
	nssv15968965	nsv4056268	chr2: 44,281,377 – 44,281,593	0.003 (72/21606)	0.0075 (71/9448)	0.00013 (1/7624)	gnomAD-SV	nstd166
	nssv16912289	nsv5442521	chr2: 44,281,377 – 44,281,614	0.002 (10/6404)	0.0056 (10/1786)	0 (0/1268)	Byrska-Bishop et al., 2022	nstd206
	nssv17391926	nsv5879227	chr2: 44,281,377 - 44,281,611	0.002 (3/1710)	Not provided		Almarri et al., 2020	nstd209
	nssv18209795	nsv6343942	chr2: 44,281,377 – 44,281,612	<0.001 (1/37048)	0.00021	0	Sedlazeck et al., 2020	nstd223
OCA2	nssv1613157	nsv933963	chr15: 28,017,775 – 28,020,640	Not provided			Boone et al., 2013	nstd80
	nssv15154304	nsv3900673	chr15: 28,017,693 – 28,020,814	Not provided			ClinVar	nstd102
	essv15198879	nsv4419171	chr15: 28,017,704 – 28,020,677	Not provided			DGV Gold Standard	nstd174
	essv15198879	esv3635987	chr15: 28,017,704 – 28,020,677	0.0008 (4/5008)	0.0015	0.001	1kG Consortium Phase3	estd214
	nssv15129999	nsv4578589	chr15: 28,017,719 – 28,020,677	Not provided			ClinVar	nstd102
	essv6563781	nsv4419171	chr15: 28,017,704 – 8,020,677	Not provided			DGV Gold Standard	nstd174
	essv6563781	esv2663244	chr15: 28,017,719 – 28,020,677	Not provided			1kG Consortium Phase1	estd199
	nssv16198586	nsv4672348	chr15: 28,017,719 - 28,020,677	0.021 (40/1892)	Not provided		NCBI Curated common SVs	nstd186
	nssv17385587	nsv5932760	chr15: 28,017,719 – 28,020,676	Not provided			Almarri et al., 2020	nstd209
	nssv18392451	nsv6961192	chr15: 28,017,720 - 28,020,676	0.0008 (230/275,252)	0.002 (178/83,178)	0.0003 (48/159,156)	TOPMed SV (Jun et al., 2023)	nstd229
	nssv17470934	nsv5864131	chr15: 28,017,734 – 28,020,583	Not provided			Almarri et al., 2020	nstd209
	nssv18392452	nsv6971847	chr15: 28,017,801 - 28,020,700	0.0008 (230/275,378)	0.002 (178/83,210)	0.0003 (48/159,236)	TOPMed SV (Jun et al., 2023)	nstd229
PIGN	nssv18043338	nsv6534309	chr18: 62,152,601 – 62,157,700	<0.001 (5/39154)	0.00059	0	Sedlazeck et al., 2020	nstd223
	nssv15129346	nsv3875688	chr18: 62,152,637-62,157,701	Not provided			ClinVar	nstd102
	nssv16297132	nsv4769347	chr18: 62,152,637-62,157,702	Not provided			ClinVar	nstd102
	nssv18790214	nsv7095388	chr18: 62,152,637 – 62,157,702	Not provided			ClinVar	nstd102
	nssv16297105	nsv4769206	chr18: 62,152,638 – 62,157,701	Not provided			ClinVar	nstd102
	nssv15840423	nsv4267659	chr18: 62,152,639 – 62,157,701	<0.001 (13/21694)	0.0013 (12/9534)	0.00013 (1/7624)	gnomAD-SV	nstd166
	nssv16370774	nsv4859867	chr18: 62,152,640 – 62,157,701	<0.001 (10/16834)	0.0014 (10/7186)	0 (0/5144)	Abel et al., 2020	nstd200
	nssv18419227	nsv7000298	chr18: 62,152,640 - 62,157,705	0.00028 (78/275,676)	0.0008 (70/83,380)	0.0000502 (8/159,354)	TOPMed SV (Jun et al., 2023)	nstd229
SLC2A5	nssv15965374	nsv4049008	chr1: 9,045,605 - 9,049,441	0.001 (26/21,692)	0.00073 (7/9,534)	0.002 (15/7,622)	gnomAD-SV	nstd166
	nssv16416445	nsv4894331	chr1: 9,045,605 - 9,049,477	0.002 (47/29,246)	Not provided		Abel et al., 2020	nstd200
CYRZ	essv17109502	esv3819685	chr1: 74,717,875 - 74,720,422	0.004 (20/5008)	0.0008	0.0139	1KG Consortium Phase 3 Integrated SV	estd219
	essv9762951	nsv4411889	chr1: 74,717,875 - 74,717,883	Not provided			DGV Gold Standard	nstd174
	essv9762951	esv3564204	chr1: 74,717,876 - 74,720,323	Not provided			GoNL	estd215
	nssv15852142	nsv4035878	chr1: 74,717,912 - 74,720,327	0.004 (84/21694)	0.0017 (16/9,534)	0.007 (57/7,624)	gnomAD-SV	nstd166
	essv26059353	esv4006200	chr1: 74,717,913 - 74,720,327	Not provided			Wong et al., 2017	estd231
	nssv17387683	nsv5867557	chr1: 74,717,913 - 74,720,326	Not provided			Almarri et al. 2020	nstd209
	nssv18426252	nsv6654434	chr1: 74,717,913 - 74,720,328	0.005 (1,316/275,448)	0.001 (111/83,276)	0.007 (1166/159,268)	TOPMed SV (Jun et al., 2023)	nstd229
	nssv17480758	nsv5830751	chr1: 74,717,933 - 74,720,232	Not provided			Almarri et al. 2020	nstd209
SELP	essv10186533	nsv4411201	chr1: 169,606,506 - 169,612,617	Not provided			DGV Gold Standard	nstd174
		esv3587886	chr1: 169,606,506 - 169,612,617	0.0008 (4/5,008)	0.0023	0	1kG Consortium Phase3	estd214
	essv5469617	esv2658365	chr1: 169,606,524 - 169,612,568	Not provided			1kG Consortium Phase1	estd199
	nssv15856883	nsv4056348	Chr1: 169,606,526 - 169,612,568	0.002 (48/21,694)	0.005 (47/9,534)	0 (0/7,624)	gnomAD-SV	nstd166
	nssv18363273	nsv6644036	Chr1: 169,606,526 - 169,612,571	0.002 (429/275,514)	0.005 (398/83,314)	0.00018 (29/159,254)	TOPMed SV (Jun et al., 2023)	nstd229
WDR43	nssv16413566	nsv5344095	chr2: 28,894,681 - chr6: 76,474,290	<0.001 (6/16,834)	Not provided		Abel et al., 2020	nstd200
LTBP1/BIRC6	nssv15967890	nsv4057726	chr2: 32,403,813 – 33,107,416	<0.001 (16/21692)	0.0001 (1/9534)	0.0018 (14/7624)	gnomAD-SV	nstd166
	nssv16388508	nsv4788356	chr2: 32,403,832 – 33,107,416	<0.001 (4/16834)	0.0004 (3/7186)	0	Abel et al 2020	nstd200
	nssv17661750	nsv6299031	chr2: 32,403,832 – 33,107,416	0.04 (254/6356)	Not provided		NCBI Curated common SVs	nstd186
	nssv18208208	nsv6335984	chr2: 32,403,832 – 33,107,415	<0.001 (39/39302)	0.00019	0.0012	Sedlazeck et al., 2020	nstd223
	essv10447704	esv3590249	chr2: 32,403,872 – 33,107,363	0.0006 (3/5008)	0	0.001	1kG Consortium Phase3	estd214
	nssv16912060	nsv5451488	chr2: 32,408,832 – 33,107,416	<0.001 (3/6404)	Not provided		Byrska-Bishop et al., 2022	nstd206
MLH1	nssv18771671	nsv7051268	chr3: 37,000,362 - 39,352,689	0.00013 (35/272,382)	0.0004 (34/82,510)	6.4e-06 (1/157,324)	TOPMed SV (Jun et al., 2023)	nstd229
WASF1	nssv18777817	nsv7055005	Chr6: 108,167,886 - 110,172,775	0.000029 (8/274,324)	9.6e-05 (8/83084)	0 (0/158,426)	TOPMed SV (Jun et al., 2023)	nstd229
SLC7A2	nssv16344760	nsv4821307	Chr8:17,418,933 - 17,544,081	<0.001 (2/16,834)	0.00027 (2/7,186)	0	Abel et al., 2020	nstd200
	nssv16501458	nsv4959416	Chr8 17,419,009 - 17,544,081	<0.001 (2/29,246)	0.0002 (2/9872)	0	Abel et al., 2020	nstd200
	nssv15928809	nsv4165320	Chr8: 17,419,010 - 17,544,122	<0.001 (3/21,694)	0.003 (3/9,534)	0	gnomAD-SV	nstd166
ADAM2	essv25976384	esv3982912	chr8: 39,788,370 - 39,792,048	Not provided			Fakhro et al., 2015	estd229
	nssv15930601	nsv4172323	chr8: 39,788,373 - 39,792,048	<0.001 (6/21,694)	0 (0/9,534)	0.00066 (5/7,624)	gnomAD-SV	nstd166
	nssv18556480	nsv6839857	chr8: 39,788,373 - 39,792,052	<0.001 (60/274,822)	8.4e-05 (7/83,306)	0.0003 (47/158,620)	TOPMed SV (Jun et al., 2023)	nstd229
OAS3	nssv15813293	nsv4230812	chr12: 112,959,281 - 112,961,212	0.004 (78/21,694)	0.008 (77/9,534)	0 (0/7,624)	gnomAD-SV	nstd166
	essv14606268	esv3630791	chr12: 112,959,282 - 112,961,210	0.0016 (8/5,008)	0.0061	0	1kG Consortium Phase3	estd214
	nssv18355773	nsv6925057	chr12: 112,959,284 - 112,961,213	0.003 (730/273,938)	0.008 (670/82,818)	0.00037 (59/158,332)	TOPMed SV (Jun et al., 2023)	nstd229
	nssv16803163	nsv5278966	chr12 : 112,959,301-112,961,200	Not provided			Chen et al., 2021	nstd204
NBEA	nssv16553606	nsv5356761	chr13: 35,213,644 - chrX:11,934,864	0.031 (904/29,246)	Not provided		Abel et al., 2020	nstd200
DNAJC15	nssv18009057	nsv6492849	Chr13: 43,078,470 - 43,079,390	<0.001 (1/39,008)	0	0	Sedlazeck et al., 2020	nstd223
	nssv16542320	nsv4997208	Chr13 : 43,078,473 - 43,079,390	<0.001 (1/29,246)	0	0.001 (1/8,402)	Abel et al., 2020	nstd200
RB1	nssv18753288	nsv7077465	chr13: 48,466,591 - 48,473,908	0.000064 (18/274068)	1.8e-04 (15/83,058)		TOPMed SV (Jun et al., 2023)	nstd229
COL4A2/COL4A1	nssv18197094	nsv6480234	Chr13: 110,294,204 - 110,633,815	0.001 (1/39296)	0.001	0	Sedlazeck et al., 2020	nstd223
	nssv18601955	nsv6957375	Chr13: 110,294,204 - 110,633,816	0.000043 (12/275,416)	0.00013 (11/83304)	0.00000628 (1/159,358)	TOPMed SV (Jun et al., 2023)	nstd229
POLR2C	nssv15831782	nsv4245474	Chr16: 57,470,265 - 57,470,972	0.006 (135/21,682)	0.013 (128/9,522)	0.0001 (1/7,624)	gnomAD-SV	nstd166
	nssv17709480	nsv5528634	Chr16: 57,470,331 - 57,470,972	0.004 (26/6,404)	0.012 (22/1,786)	0 (0/1,268)	Byrska-Bishop et al., 2022	nstd206
	nssv17387565	nsv5942738	Chr16: 57,470,352 - 57,470,971	Not provided			Almarri et al., 2020	nstd209
	nssv18029794	nsv6511822	Chr16 : 57,470,352 - 57,470,972	<0.001 (1/36,124)	0	0	Sedlazeck et al., 2020	nstd223
	nssv18401256	nsv6984486	Chr16 : 57,470,356 - 57,470,977	<0.001 (59/263,922)	0.00064 (50/78,442)	5.2e-05 (8/153,582)	TOPMed SV (Jun et al., 2023)	nstd229
TULP2	essv16075040	esv3644604	Chr19: 48,883,052 - 48,884,605	0.0006 (3/5008)	0.0015	0	1kG Consortium Phase3	estd214
	nssv18047094	nsv6520353	Chr19: 48,883,109 - 48,884,642	<0.001 (27/39,246)	0.0023	0.00017	Sedlazeck et al., 2020	nstd223
	nssv17723929	nsv5526097	Chr19: 48,883,143 - 48,884,694	0.000312 (2/6,404)	Not provided		Byrska-Bishop et al., 2022	nstd206
	nssv15844848	nsv4272400	Chr19: 48,883,172 - 48,884,694	0.000092 (2/21,694)	0.0002 (2/9,534)	0	gnomAD-SV	nstd166
	nssv18424048	nsv7007217	Chr19: 48,883,192 - 48,884,643	<0.001 (270/274,654)	0.0028 (232/83,060)	0.0002 (34/158,776)	TOPMed SV (Jun et al., 2023)	nstd229
	nssv18424049	nsv7002161	Chr19: 48,883,200 - 48,884,643	<0.001 (269/274,300)	0.0028 (232/83,060)	0.0002 (34/158,776)	TOPMed SV (Jun et al., 2023)	nstd229

## Sheet: Notes
1The ancestry related variant allele frequencies (VAF) in dbVar were extracted from VCF uploaded by dbVar studies. The variant allele count (AC) and total allele number (AN) were also included in this table if available in dbVar.
