# Supplementary material for: Rare pathogenic structural variants show potential to enhance prostate cancer germline testing for African men
Source: Research Square preprint supplement (doi:10.21203/rs.3.rs-4531885/v1), 2024-06-13
Supplement: Supplementary file 2 [file b4d31d421956acc4d90372ef.xlsx]

## Sheet: cancergene_rarePPSV
gene_ID	gene_name	chrom1	pos1	chrom2	pos2	SVTYPE	name	INFO_MAF	SBantu_MAF	European_MAF	SVLEN	func_type	dbvar	clinvar_significance	clinvar_phenotype	strvctvre_score	CADD_SV_score	POSTRE_score	PhenoSV_score	in_MSigDB_hallmark_gene	in_MSigDB_oncogene	in_COSMIC_cancergene	sampleID	GT	Ethnicity	Age	PSA	ISUP_GG
ENSG00000142583	SLC2A5	chr1	9045605	chr1	9049441	DUP	graphtyper_239_1_239	0.00294118	0	0.00877193	3836	IED	in_dbvar	not provided	not provided	0.583	6.649	0.63	0.84082	TRUE	TRUE	FALSE	11099	0/1	European	70	9.9	5
ENSG00000116791	CRYZ	chr1	74717913	chr1	74720327	DEL	graphtyper_1165_1_1165	0.00294118	0	0.00877193	2414	pLoF	in_dbvar	not provided	not provided	0.555	10.44	0.33	0.896322	TRUE	TRUE	FALSE	11830	0/1	European	60	3.5	5
ENSG00000198734	F5	chr1	169536171	chr1	169536973	DEL	graphtyper_2025_1_2025	0.00299401	0.00454545	0	793	pLoF	novel	not provided	not provided	0.626	8.795	0.5	0.984947	TRUE	TRUE	FALSE	N0015	0/1	African	69	unknown	4
ENSG00000174175	SELP	chr1	169606524	chr1	169612568	DEL	graphtyper_2027_1_2027	0.00294118	0.00442478	0	6044	pLoF	in_dbvar	not provided	not provided	0.564	9.682	0.38	0.806543	TRUE	TRUE	FALSE	SMU200	0/1	African	53	62.38	1
ENSG00000049323	LTBP1	chr2	32403832	chr2	33107415	DUP	graphtyper_3695_1_3695	0.00297619	0	0.00877193	703583	CG	in_dbvar	not provided	not provided	0.621	11.43	0.5	0.660958	TRUE	TRUE	FALSE	5287	0/1	European	54	4.3	5
ENSG00000115760	BIRC6	chr2	32403832	chr2	33107415	DUP	graphtyper_3695_1_3695	0.00297619	0	0.00877193	703583	CG	in_dbvar	not provided	not provided	0.621	11.43	0.5	0.660958	FALSE	TRUE	TRUE	5287	0/1	European	54	4.3	5
ENSG00000153094	BCL2L11	chr2	111122626	chr2	111125901	DEL	graphtyper_4740_1_4740	0.0030303	0.00446429	0	3275	pLoF	novel	not provided	not provided	0.618	8.853	0.49	0.620989	TRUE	TRUE	FALSE	KAL0101	0/1	African	71	32.39	5
ENSG00000138376	BARD1	chr2	214768022	chr2	214772899	DEL	graphtyper_6089_1_6089	0.00320513	0.00485437	0	4877	pLoF	novel	not provided	not provided	0.506	7.367	0.61	0.920936	TRUE	TRUE	TRUE	N0073	0/1	African	62	unknown	unknown
ENSG00000083123	BCKDHB	chr6	80252925	chr6	80293918	DEL	graphtyper_16003_1_16003	0.00294118	0.00442478	0	40993	pLoF	novel	not provided	not provided	0.587	12.4	0.38	0.39077	TRUE	TRUE	FALSE	SMU097	0/1	African	60	37.07	1 or 2
ENSG00000048052	HDAC9	chr7	18929912	chr7	18951959	DEL	graphtyper_17824_1_17824	0.00295858	0	0.00877193	22047	pLoF	novel	not provided	not provided	0.779	8.907	0.75	0.892234	TRUE	TRUE	FALSE	11265	0/1	European	67	11.3	5
ENSG00000122642	FKBP9	chr7	32973916	chr7	32976067	DEL	graphtyper_17996_1_17996	0.00294118	0.00442478	0	2151	pLoF	novel	not provided	not provided	0.592	10.69	0.37	0.965271	FALSE	TRUE	TRUE	UP2142	0/1	African	73	625	5
ENSG00000003989	SLC7A2	chr8	17418976	chr8	17544122	DEL	graphtyper_20403_1_20403	0.00591716	0.00884956	0	125146	pLoF	in_dbvar	not provided	not provided	0.532	24.6	0.63	0.166554	TRUE	TRUE	FALSE	UP2035	0/1	African	70	680	5
ENSG00000003989	SLC7A2	chr8	17418976	chr8	17544122	DEL	graphtyper_20403_1_20403	0.00591716	0.00884956	0	125146	pLoF	in_dbvar	not provided	not provided	0.532	24.6	0.63	0.166554	TRUE	TRUE	FALSE	KAL0054	0/1	African	64	42.93	5
ENSG00000104755	ADAM2	chr8	39788370	chr8	39792048	DEL	graphtyper_20701_1_20701	0.00294118	0	0.00877193	3678	pLoF	in_dbvar	not provided	not provided	0.433	3.7	0.38	0.5489	TRUE	TRUE	FALSE	14862	0/1	European	64	12.4	5
ENSG00000156802	ATAD2	chr8	123320266	chr8	123321194	DEL	graphtyper_21831_1_21831	0.00295858	0.00446429	0	926	pLoF	novel	not provided	not provided	0.662	11.21	0.5	0.986577	TRUE	TRUE	FALSE	KAL0101	0/1	African	71	32.39	5
ENSG00000111331	OAS3	chr12	112959281	chr12	112961212	DEL	graphtyper_29892_1_29892	0.00591716	0.00892857	0	1931	pLoF	in_dbvar	not provided	not provided	0.553	3.389	0.47	0.553051	TRUE	TRUE	FALSE	UP2101	0/1	African	57	75	5
ENSG00000111331	OAS3	chr12	112959281	chr12	112961212	DEL	graphtyper_29892_1_29892	0.00591716	0.00892857	0	1931	pLoF	in_dbvar	not provided	not provided	0.553	3.389	0.47	0.553051	TRUE	TRUE	FALSE	SMU032	0/1	African	67	50	2 or 3
ENSG00000120675	DNAJC15	chr13	43078470	chr13	43079390	DEL	graphtyper_30712_1_30712	0.00295858	0	0.00877193	920	pLoF	in_dbvar	not provided	not provided	0.385	7.88	0.38	0.961284	TRUE	TRUE	FALSE	17135	0/1	European	63	7.79	5
ENSG00000134871	COL4A2	chr13	110294204	chr13	110633815	DUP	graphtyper_31683_1_31683	0.003125	0.0046729	0	339611	CG	in_dbvar	not provided	not provided	0.758	7.033	0.88	0.887731	TRUE	TRUE	FALSE	UP2039	0/1	African	71	319	4
ENSG00000187498	COL4A1	chr13	110294204	chr13	110633815	DUP	graphtyper_31683_1_31683	0.003125	0.0046729	0	339611	CG	in_dbvar	not provided	not provided	0.758	7.033	0.88	0.887731	TRUE	TRUE	FALSE	UP2039	0/1	African	71	319	4
ENSG00000103365	GGA2	chr16	23470115	chr16	23470850	DEL	graphtyper_34636_1_34636	0.00295858	0	0.00892857	735	pLoF	novel	not provided	not provided	0.511	9.358	0.5	0.936182	TRUE	TRUE	FALSE	16263	0/1	European	63	4.81	5
ENSG00000102978	POLR2C	chr16	57470352	chr16	57470972	DEL	graphtyper_34966_1_34966	0.00308642	0.0047619	0	620	pLoF	in_dbvar	not provided	not provided	0.369	21.1	0.63	0.971119	TRUE	TRUE	FALSE	N0053	0/1	African	71	31.5	4
ENSG00000104804	TULP2	chr19	48883143	chr19	48884694	DEL	graphtyper_39091_1_39091	0.00588235	0.00884956	0	1551	pLoF	in_dbvar	not provided	not provided	0.508	10.44	0.5	0.89376	TRUE	TRUE	FALSE	SMU111	0/1	African	62	583	unknown
ENSG00000104804	TULP2	chr19	48883143	chr19	48884694	DEL	graphtyper_39091_1_39091	0.00588235	0.00884956	0	1551	pLoF	in_dbvar	not provided	not provided	0.508	10.44	0.5	0.89376	TRUE	TRUE	FALSE	SMU200	0/1	African	53	62.38	1
ENSG00000151914	DST	chr1	215567414	chr6	56652607	TRA	graphtyper_2602_1_2602	0.00588235	0.00884956	0	NA	pLoF	novel	not provided	not provided	not available	not available	1	0.828194	TRUE	TRUE	FALSE	UP2039	0/1	African	71	319	4
ENSG00000151914	DST	chr1	215567414	chr6	56652607	TRA	graphtyper_2602_1_2602	0.00588235	0.00884956	0	NA	pLoF	novel	not provided	not provided	not available	not available	1	0.828194	TRUE	TRUE	FALSE	SMU101	0/1	African	70	4.28	3
ENSG00000163811	WDR43	chr2	28894681	chr6	76474290	TRA	graphtyper_3654_1_3654	0.00294118	0	0.00877193	NA	pLoF	in_dbvar	not provided	not provided	not available	not available	0.88	0.74087	TRUE	TRUE	FALSE	10651	0/1	European	68	6.8	5
ENSG00000076242	MLH1	chr3	37000362	chr3	39352689	INV	graphtyper_7155_1_7155	0.00294118	0.00442478	0	2352327	pLoF	in_dbvar	not provided	not provided	not available	not available	0.83	0.984262	TRUE	TRUE	TRUE	SMU080	0/1	African	64	23.31	4
ENSG00000114861	FOXP1	chr3	71097066	chr3	74525618	INV	graphtyper_7549_1_7549	0.00588235	0.00884956	0	3428552	pLoF	novel	not provided	not provided	not available	not available	1	0.917311	FALSE	TRUE	TRUE	UP2101	0/1	African	57	75	5
ENSG00000114861	FOXP1	chr3	71097066	chr3	74525618	INV	graphtyper_7549_1_7549	0.00588235	0.00884956	0	3428552	pLoF	novel	not provided	not provided	not available	not available	1	0.917311	FALSE	TRUE	TRUE	N0084	0/1	African	65	591	4
ENSG00000044115	CTNNA1	chr5	138903881	chr19	21614900	TRA	graphtyper_14253_1_14253	0.00294118	0	0.00877193	NA	pLoF	novel	not provided	not provided	not available	not available	0.88	0.980225	TRUE	FALSE	TRUE	13179	0/1	European	59	8.4	5
ENSG00000181163	NPM1	chr5	171405667	chr20	2824472	TRA	graphtyper_14634_1_14634	0.00294118	0	0.00877193	NA	pLoF	novel	not provided	not provided	not available	not available	0.88	0.944443	TRUE	TRUE	TRUE	UP2123	0/1	European	64	8.2	5
ENSG00000170927	PKHD1	chr6	51981375	chr15	30874073	TRA	graphtyper_15577_1_15577	0.00613497	0.00925926	0	NA	pLoF	novel	not provided	not provided	not available	not available	1	0.814052	TRUE	TRUE	FALSE	N0056	0/1	African	70	153	5
ENSG00000170927	PKHD1	chr6	51981375	chr15	30874073	TRA	graphtyper_15577_1_15577	0.00613497	0.00925926	0	NA	pLoF	novel	not provided	not provided	not available	not available	1	0.814052	TRUE	TRUE	FALSE	SMU196	0/1	African	47	9.46	1
ENSG00000112290	WASF1	chr6	108167886	chr6	110172775	INV	graphtyper_16412_1_16412	0.00294118	0.00442478	0	2004889	pLoF	in_dbvar	not provided	not provided	not available	not available	0.82	0.975809	TRUE	TRUE	FALSE	N0048	0/1	African	70	83.34	5
ENSG00000147548	NSD3	chr8	38373012	chr8	83827626	INV	graphtyper_20679_1_20679	0.00326797	0	0.00943396	45454614	pLoF	novel	not provided	not provided	not available	not available	0.88	0.782529	FALSE	TRUE	TRUE	17392	0/1	European	53	3.5	5
ENSG00000151914	DST	chr9	132876361	chr6	56896165	TRA	graphtyper_23815_1_23815	0.00294118	0	0.00877193	NA	pLoF	novel	not provided	not provided	not available	not available	1	0.951189	TRUE	TRUE	FALSE	11452	0/1	European	67	11	1
ENSG00000085276	MECOM	chr10	35912510	chr3	169484020	TRA	graphtyper_24637_1_24637	0.00294118	0	0.00877193	NA	pLoF	novel	not provided	not provided	not available	not available	1	0.885618	FALSE	TRUE	TRUE	16311	0/1	European	62	16.5	5
ENSG00000172915	NBEA	chr13	35213644	chrX	11934865	TRA	graphtyper_30607_1_30607	0.00299401	0	0.00925926	NA	pLoF	in_dbvar	not provided	not provided	not available	not available	0.88	0.961371	FALSE	TRUE	TRUE	11926	0/1	European	57	16	5
ENSG00000139687	RB1	chr13	48466588	chr13	48473911	INV	graphtyper_30802_1_30802	0.00294118	0.00442478	0	7323	pLoF	in_dbvar	not provided	not provided	not available	not available	0.83	0.973764	TRUE	TRUE	TRUE	SMU064	0/1	African	70	13.68	3
ENSG00000137804	NUSAP1	chr15	41375953	chr20	34021425	TRA	graphtyper_33404_1_33404	0.00294118	0.00442478	0	NA	pLoF	novel	not provided	not provided	not available	not available	1	0.978965	TRUE	TRUE	FALSE	KAL0022	0/1	African	68	unknown	5
ENSG00000072062	PRKACA	chr19	14110147	chr3	170090999	TRA	graphtyper_38437_1_38437	0.00295858	0.00446429	0	NA	pLoF	novel	not provided	not provided	not available	not available	1	0.972314	TRUE	TRUE	TRUE	SMU061	0/1	African	65	12.09	3
ENSG00000137804	NUSAP1	chr20	34021424	chr15	41375954	TRA	graphtyper_39890_1_39890	0.00588235	0.00884956	0	NA	pLoF	novel	not provided	not provided	not available	not available	1	0.978965	TRUE	TRUE	FALSE	KAL0022	0/1	African	68	unknown	5
ENSG00000137804	NUSAP1	chr20	34021424	chr15	41375954	TRA	graphtyper_39890_1_39890	0.00588235	0.00884956	0	NA	pLoF	novel	not provided	not provided	not available	not available	1	0.978965	TRUE	TRUE	FALSE	KAL0091	0/1	African	70	182	5

## Sheet: README
gene_ID: the identifier of gene from ENSEMBL gene annotation file (GRCh38 assembly, release 108)
gene_name: gene name from ENSEMBL gene annotation file (GRCh38 assembly, release 108)
chrom1: chromosome of first breakpoint
pos1: position of first breakpoint
chrom2: chromosome of second breakpoint
pos2: position of second breakpoint
SVTYPE: svtype, including deletion(DEL), duplication (DUP), inversion(INV), insertion (INS) and translocation (TRA)
name: the unique identifier of SV
INFO_MAF: the minor allele frequency of all samples
African_MAF: monor allele frequency of African samples
European_MAF: minor allele frequency of European samples
SVLEN: SV length, the SVLEN for INS, INV or TRA is 0.
func_type: Gene impact type, including pLoF, CG and IED
dbvar: whether in dbvar, including "in_dbvar" and "novel"
clinvar_significance: the clinical significance of SV recorded in ClinVar database, including values of "not provided", "pathogenic" and "benign"
clinvar_phenotype: the penotype associated with the SV recorded in ClinVar database
strvctvre_score: the SV pathogenicity score predicted by StrVctvre
CADD_SV_score: the SV deleterious score predicted by CADD-SV
POSTRE_score: the SV pathogenicity score by POSTRE
PhenoSV score: the SV pathogenicity score by PhenoSV
in_MSigDB_hallmark_gene: whether in MSigDB hallmark gene set
in_MSigDB_oncogene: whether in MSigDB oncogenic signature gene set
in_COSMIC_cancergene: whether in COSMIC cancer gene census
sampleID: unique identifier of patient
GT: genotype
Ethnicity: ancestry assigned
Age: age as diagnosis
PSA: Prostate Specific Antigen
ISUP_GG: International Society of Urological pathology (ISUP) Group Grading (GG)
